# Supplementary material for: A Novel Standardized Cannabis sativa L. Extract and Its Constituent Cannabidiol Inhibit Human Polymorphonuclear Leukocyte Functions
Source: MDPI journal article supplement (doi:10.3390/ijms20081833), 2019-04-13
Supplement: s1 [file s1]

Code

Sale specification: SVPF

Version n. 2

CM5

Cannabis sativa extract 5

Effective date: 11.01.2018  
Discard any previous version

**Commercial name:** Cannabis sativa extract 5  
**Scientific name:** Cannabis sativa L. extract  
**CAS Number:** 89958-21-4  
**Chemical name (cannabidiol):** 2-[(1R, 6R)-6-isopropenyl-3-methyl-2-cyclohexen-1-yl]-5-pentyl-1,3-benzenediol

**Molecular formula (cannabidiol):**

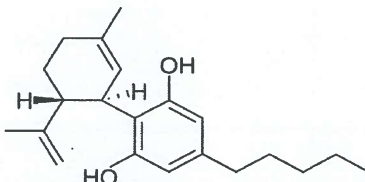

C<sub>21</sub>H<sub>30</sub>O<sub>2</sub>

**Molecular weight (cannabidiol):** 314.5 g/mol  
**Description:** Dark green viscous liquid  
**Storage and packaging:** Preserve in tight container, protected from light, and humidity. Do not store above 25°C. HDPE wide neck drum with screw cap.

| <u>Test</u>                                                    | <u>Limit</u>                        | <u>Method</u>               |
|----------------------------------------------------------------|-------------------------------------|-----------------------------|
| Appearance                                                     | Dark green viscous liquid           | In-house (visual)           |
| Identification (HPLC)                                          | Complies                            | In-house                    |
| Cannabinoids:                                                  |                                     |                             |
| Sum of CBD and CBDA, expressed as cannabidiol (on as-is basis) | 5.0 ± 0.5 %                         | In-house (HPLC)             |
| Sum of THC and THCA (on as-is basis)                           | ≤ 0.2 %                             |                             |
| Residual solvents:                                             |                                     |                             |
| Ethanol                                                        | Not more than 5000 ppm              | In-house (GC)               |
| Water content (KF)                                             | ≤ 1.0 %                             | Ph Eur (2.5.12) current ed. |
| Microbial contamination:                                       |                                     |                             |
| Total aerobic microbial count                                  | Not more than 10 <sup>3</sup> cfu/g | Ph Eur (2.6.12) current ed. |
| Total combined yeast/mould count                               | Not more than 10 <sup>2</sup> cfu/g | Ph Eur (2.6.12) current ed. |
| Bile-tolerant Gram-negative bacteria                           | Not more than 10 <sup>2</sup> cfu/g | Ph Eur (2.6.13) current ed. |
| Escherichia coli                                               | Absent/10 g                         | Ph Eur (2.6.13) current ed. |
| Salmonella                                                     | Absent/25 g                         | Ph Eur (2.6.31) current ed. |

**Remarks:** medium chain triglycerides are used as carrier

Code

Sale specification: SVPF

Version n. 2

CM5

Cannabis sativa extract 5

Effective date: 11.01.2018  
Discard any previous version

Prepared by:  
S. Vincenti/ Regulatory Affairs

 11.01.2018

Approved by:  
G. Tossi / Technical Director

 11.01.18

**Customer's Approval**

We accept all the above specification for the product :

Signed by: .....

Function: .....

Company: .....

Date: .....

Code

Sale specification: SVPF

Version N 1

CBD

Cannabidiol

Effective date: 10.08.2018  
Discard any previous version

**Trade name:** Cannabidiol

**Scientific name:** Cannabidiol

**CAS number:** 13956-29-1

**Chemical name:** 2-[(1*R*,6*R*)-6-isopropenyl-3-methylcyclohex-2-en-1-yl]-5-pentylbenzene-1,3-diol

**Molecular formula :**

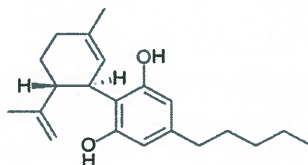

**Molecular weight:** 314.5 g/mol

**Description:** White/off-white or slightly yellow powder

**Storage and packaging:** Preserve in tight container, protected from light and humidity. Do not store above 25°C.  
Double polyethylene, into plastic drums.

| Test                                              | Limit                                     | Method                        |
|---------------------------------------------------|-------------------------------------------|-------------------------------|
| Appearance                                        | White/off-white or slightly yellow powder | In-house (visual)             |
| Identification (HPLC)                             | Complies                                  | In-house                      |
| Identification (IR)                               | Complies                                  | Ph. Eur. (2.2.24) current ed. |
| Assay (dried substance)                           | Between 98.0 % and 102.0 %                | In-house (HPLC)               |
| Related substances:                               |                                           | In-house (HPLC)               |
| <i>Total THC (sum of Δ8-THC and Δ9-THC)</i>       | Not more than 0.10%                       |                               |
| <i>CBDV</i>                                       | Not more than 0.5%                        |                               |
| <i>CBD-C4</i>                                     | Not more than 0.5%                        |                               |
| <i>Other related substances (each)</i>            | Not more than 0.10%                       |                               |
| <i>Related substances (total)</i>                 | Not more than 1.0%                        |                               |
| Melting point                                     | Between 65°C and 69°C                     | Ph. Eur. (2.2.14) current ed. |
| Water content                                     | Not more than 1.0%                        | Ph. Eur. (2.5.12) current ed. |
| Sulphated Ash                                     | Not more than 0.1%                        | Ph. Eur. (2.4.14) current ed. |
| Specific Optical Rotation<br>(on dried substance) | Between -135.0 and -125.0                 | In-house                      |
| Residual solvents                                 |                                           | In-house (GC)                 |
| <i>Ethanol</i>                                    | Not more than 5000 ppm                    |                               |
| <i>Hexane</i>                                     | Not more than 290 ppm                     |                               |
| Microbiology                                      |                                           |                               |
| <i>Total aerobic microbial count</i>              | Not more than 10 <sup>3</sup> CFU/g       | Ph. Eur. (2.6.12) current ed. |
| <i>Total combined yeast/mould count</i>           | Not more than 10 <sup>2</sup> CFU/g       | Ph. Eur. (2.6.12) current ed. |
| <i>Bile-tolerant Gram-negative bacteria</i>       | Not more than 10 <sup>2</sup> CFU/g       | Ph. Eur. (2.6.13) current ed. |
| <i>Escherichia coli</i>                           | Absent/10g                                | Ph. Eur. (2.6.13) current ed. |
| <i>Salmonella</i>                                 | Absent/25g                                | Ph. Eur. (2.6.31) current ed. |

Code

Sale specification: SVPF

Version N 1

CBD

Cannabidiol

Effective date: 10.08.2018  
Discard any previous version

Remarks:

Prepared by:  
D. Maradei / QA Manager

Approved by:  
G.Tossi / Technical Director

*[Signature]* 08.08.2018  
*[Signature]* 08.08.18

#### Customer's Approval

We accept all the above specification for the product :

Signed by: .....

Function: .....

Company: .....

Date: .....
