# Supplementary material for: A Novel Standardized Cannabis sativa L. Extract and Its Constituent Cannabidiol Inhibit Human Polymorphonuclear Leukocyte Functions
Source: MDPI journal article supplement (doi:10.3390/ijms20081833), 2019-04-13
Supplement: s1 [file s1]

**Supplementary Table S1.** Real-Time PCR conditions.

| Gene Symbol  | UniGene ID | Interrogated sequences<br><i>RefSeq/GenBank mRNA</i>                                                                                                                | Detected coding transcripts                                                                                                                                                                                                                                                                                                                                                                                                                                                             | Amplicon context sequence                                                                                                                     | Chromosome location | Amplicon length | Annealing temperature (°C) | Efficiency (%) |
|--------------|------------|---------------------------------------------------------------------------------------------------------------------------------------------------------------------|-----------------------------------------------------------------------------------------------------------------------------------------------------------------------------------------------------------------------------------------------------------------------------------------------------------------------------------------------------------------------------------------------------------------------------------------------------------------------------------------|-----------------------------------------------------------------------------------------------------------------------------------------------|---------------------|-----------------|----------------------------|----------------|
| <i>TNFA</i>  | Hs.241570  | NC_000006.11<br>NG_007462.1<br>NG_012010.1<br>NT_007592.15<br>NT_113891.2<br>NT_167244.1<br>NT_167245.1<br>NT_167246.1<br>NT_167247.1<br>NT_167248.1<br>NT_167249.1 | ENST00000328965<br>ENST00000445232<br>ENST00000594551<br>ENST00000443707<br>ENST00000412275<br>ENST00000449264<br>ENST00000577810<br>ENST00000326294<br>ENST00000448781<br>ENST00000420425<br>ENST00000394126<br>ENST00000356271<br>ENST00000394128<br>ENST00000394127<br>ENST00000422942<br>ENST00000501516<br>ENST00000536318<br>ENST00000431269<br>ENST00000376122<br>ENST00000383496<br>ENST00000264203<br>ENST00000375144<br>ENST00000375142<br>ENST00000401084<br>ENST00000439554 | GGGGTCTTCCAGCTGGAGAAGGGTGA<br>CCGACTCAGCGCTGAGATCAATCGGC<br>CCGACTATCTCGACTTTGCCGAGTCTG<br>GGCAGGTCTACTTTGGGATCATTGCCCT<br>GTGAGGAGGACGAACATC | 6:31545204-31545328 | 95              | 60                         | 99             |
| <i>RPS18</i> | Hs.627414  | NC_000006.11<br>NT_007592.15<br>NT_113891.2<br>NT_167245.1<br>NT_167247.1<br>NT_167248.1<br>NT_167249.1                                                             | ENST00000454021<br>ENST00000486781<br>ENST00000484321<br>ENST00000211372<br>ENST00000477055<br>ENST00000476288<br>ENST00000439602<br>ENST00000474973<br>ENST00000457341<br>ENST00000494232<br>ENST00000434122                                                                                                                                                                                                                                                                           | GTGGAACGTGTGATCACCATTATGCAGA<br>ATCCACGCCAGTACAAGATCCCAGACTG<br>GTTCTTGAACAGACAGAAGGATGTAAAG<br>GATGGAAAATACA                                 | 6:33243742-33243838 | 67              | 60                         | 98             |
